# Supplementary material for: Impact of Multidisciplinary Team Escalating Approach on Antibiotic Stewardship in the United Arab Emirates
Source: MDPI journal article supplement (doi:10.3390/antibiotics10111289), 2021-10-22
Supplement: s1 [file s1]

**Table S1: Unadjusted regression analysis of the clinical outcomes for different ward settings comparing non-intervention and ASP MDT intervention groups.**

|                 | LOS    |                         | DOT   |                           | Readmission |                      | Mortality |                      |
|-----------------|--------|-------------------------|-------|---------------------------|-------------|----------------------|-----------|----------------------|
|                 | p      | Coefficient<br>(95% CI) | p     | Coefficient<br>(95% CI)   | p           | OR<br>(95% CI)       | p         | OR<br>(95% CI)       |
| <b>Medical</b>  | < 0.01 | -0.21<br>(-0.29, -0.14) | 0.201 | -1.187<br>(-3.007, 0.634) | < 0.01      | 0.66<br>(0.54, 0.79) | 0.120     | 0.79<br>(0.59, 1.06) |
| <b>ICU</b>      | 0.15   | 2.42<br>(2.27, 2.56)    | 0.770 | 2.71<br>(-15.55, 20.97)   | 0.665       | 1.28<br>(0.41, 3.92) | 0.331     | 0.76<br>(0.44, 1.31) |
| <b>Burns</b>    | 0.31   | -0.18<br>(-0.53, 0.17)  | 0.380 | 13.63<br>(-17.27, 44.54)  | NA          | NA                   | 0.444     | 2.48<br>(0.03, 4.12) |
| <b>Combined</b> | <0.01  | -.22<br>(-0.30, -0.15)  | 0.830 | -0.26<br>(-2.63, 2.11)    | < 0.01      | 0.69<br>(0.58, 0.83) | 0.010     | 0.76<br>(0.62, 0.93) |

SD: Standard deviation; OR: Odds Ratio; LOS: Length of hospital stay in days; DOT: Days of therapy; NA: No cases found; Charlson score: comorbidity index score; Group: Non-intervention vs ASP MDT intervention group.

The non-intervention group was taken as the reference group.

**Table S2: Clinical outcomes comparison between non-intervention and ASP MDT intervention periods in a surgical setting**

|                      | LOS  |        |                  | DOT  |        |                 | Readmission |      |       |              | Mortality |      |       |              |
|----------------------|------|--------|------------------|------|--------|-----------------|-------------|------|-------|--------------|-----------|------|-------|--------------|
|                      | Mean | p      | MD               | Mean | p      | MD              | Yes         | No   | p     | OR           | Yes       | No   | p     | OR           |
|                      |      |        | (95% CI)         |      |        | (95% CI)        | n           | n    |       | (95% CI)     | n         | n    |       | (95% CI)     |
| Periods              |      | < 0.01 | - 0.22           |      | < 0.01 | - 0.28          |             |      | 0.592 | 1.06         |           |      | 0.845 | 0.92         |
|                      |      |        | (- 0.30, - 0.14) |      |        | (-0.39, - 0.17) |             |      |       | (0.84, 1.35) |           |      |       | (0.40, 2.09) |
| Non-intervention     | 9.25 |        |                  | 1.47 |        |                 | 133         | 1312 |       |              | 11        | 1434 |       |              |
| ASP MDT Intervention | 9.28 |        |                  | 1.75 |        |                 | 167         | 1543 |       |              | 12        | 1698 |       |              |

LOS: length of hospital stay; DOT: days of antibiotic therapy; OR: odds ratio; MD: mean difference using the natural logarithm; n: number of cases

**Table S3: Antibacterial consumption expressed in DDD/ 100 patient day per antibiotic class for non-intervention and ASP MDT intervention periods**

|                                    | Non-intervention period |               |         | ASP MDT Intervention period |               |         |           |
|------------------------------------|-------------------------|---------------|---------|-----------------------------|---------------|---------|-----------|
| Antibiotic Class                   | Oral<br>DDD/100 PD      | DDD/100<br>PD | Class % | Oral<br>DDD/100 PD          | DDD/100<br>PD | Class % | RR change |
| Other aminoglycosides              | 0                       | 0.8           | 1.03%   | 0                           | 0.6           | 0.78%   | 0.75      |
| Penicillins with extended-spectrum | 0.03                    | 1.1           | 1.41%   | 0.3                         | 1             | 1.29%   | 0.91      |
| Macrolides                         | 1.6                     | 6.1           | 7.84%   | 1.7                         | 3.8           | 4.91%   | 0.63      |
| First-generation cephalosporins    | 0                       | 0.4           | 0.51%   | 0                           | 0.2           | 0.26%   | 0.50      |
| Fourth-generation cephalosporins   | 0                       | 3.3           | 4.24%   | 0                           | 1.9           | 2.45%   | 0.58      |
| Third-generation cephalosporins    | 0.1                     | 4.8           | 6.17%   | 0.007                       | 8.2           | 10.59%  | 1.72      |
| Other B-lactam antibacterials      | 0                       | 0.5           | 0.64%   | 0                           | 0.4           | 0.52%   | 0.80      |
| Second-generation cephalosporins   | 0.1                     | 0.2           | 0.26%   | 0.03                        | 0.2           | 0.26%   | 1.01      |
| Fluoroquinolones                   | 0.2                     | 1.5           | 1.93%   | 0.4                         | 1.7           | 2.20%   | 1.14      |
| Lincosamides                       | 0.2                     | 0.4           | 0.51%   | 0.3                         | 1.4           | 1.81%   | 3.52      |
| Tetracyclines                      | 0.7                     | 1.1           | 1.41%   | 0.02                        | 0.8           | 1.03%   | 0.73      |
| Carbapenems                        | 0                       | 3.6           | 4.62%   | 0                           | 7.6           | 9.82%   | 2.12      |

|                                                                  |      |      |        |       |       |        |      |
|------------------------------------------------------------------|------|------|--------|-------|-------|--------|------|
| Beta-lactamase resistant penicillins                             | 0.1  | 2.7  | 3.47%  | 0.09  | 5.4   | 6.98%  | 2.01 |
| Other antibacterials                                             | 0.3  | 2.2  | 2.83%  | 1.3   | 2.1   | 2.71%  | 0.96 |
| Imidazole derivatives                                            | 0.12 | 0.34 | 0.44%  | 0.2   | 0.3   | 0.39%  | 0.89 |
| Nitrofurans derivatives                                          | 0    | 0    | 0.00%  | 0.004 | 0.004 | 0.01%  | NA   |
| Glycopeptide antibacterials                                      | 0    | 2.9  | 3.73%  | 0     | 4.1   | 5.30%  | 1.42 |
| Combinations of penicillins, incl. beta-lactamase inhibitors     | 0.5  | 44   | 56.53% | 0.9   | 33.7  | 43.54% | 0.77 |
| Combinations of sulfonamides and trimethoprim, incl. derivatives | 0.2  | 0.8  | 1.03%  | 0.4   | 1.5   | 1.94%  | 1.89 |
| Polymyxins                                                       | 0    | 0.2  | 0.26%  | 0     | 0.2   | 0.26%  | 1.01 |
| Beta-lactamase sensitive penicillins                             | 0.01 | 0.7  | 0.90%  | 0.06  | 0.9   | 1.16%  | 1.29 |

DDD: daily defined dose; PD: patient day; RR: relative rate

**Table S4: Reported microbiological outcomes for the non-intervention and ASP MDT intervention periods**

|                                                                                     | <i>n</i> (rate)*                            |                     |
|-------------------------------------------------------------------------------------|---------------------------------------------|---------------------|
|                                                                                     | Non-intervention period                     | Intervention period |
| Rate of healthcare-associated Clostridium difficile infection in all adult patients | 0                                           | 6 (0.0008)          |
| The 30-day all-cause readmission rate for patients with pneumonia                   | 17 (0.13)                                   | 14 (0.2)            |
| The 30-day all-cause readmission rate for patients with UTIs                        | 13 (0.16)                                   | 21 (0.2)            |
|                                                                                     | <i>n</i> ( <i>n</i> per 100 patient days)** |                     |
|                                                                                     | Non-intervention                            | Intervention        |
| MRSA bloodstream infection/100 adult patient days                                   | 8 (0.00015)                                 | 5 (0.0007)          |
| Rate of healthcare-associated MDRO bloodstream infection/100 adult patient days.    | 15 (0.0003)                                 | 9 (0.00019)         |

The number of cases is represented by *n*

\**n* divided by the total number of cases (C.diff., UTI, or pneumonia)

\*\**n* divided by total adult inpatient days then multiplied by 100.

**Table S5: Number of cultures growing ESBL producing bacteria**

|                   | Non-intervention group | Intervention group |
|-------------------|------------------------|--------------------|
| Community aquired | 528                    | 698                |
| Hospital aquired  | 239                    | 193                |
| Total             | 767                    | 891                |
